# Supplementary material for: Porous nanoMoC@graphite shell derived from a MOFs-directed strategy: an efficient electrocatalyst for the hydrogen evolution reaction
Source: Royal Society of Chemistry journal article supplement (doi:10.1039/c6ta01900e), 2016-01-01
Supplement: c6ta01900e1.pdf [file c6ta01900e1.pdf]

## Electronic Supplementary Information

### **Porous NanoMoC@Graphite Shell Derived from MOFs-Directed Strategy: Efficient Electrocatalyst for Hydrogen Evolution Reaction**

Zhangping Shi,<sup>a</sup> Yangxia Wang,<sup>a</sup> Huanlei Lin,<sup>b</sup> Hongbin Zhang,<sup>a</sup> Meikun Shen,<sup>a</sup>  
Songhai Xie,<sup>a</sup> Yahong Zhang,<sup>a</sup> Qingsheng Gao<sup>\*b</sup> and Yi Tang<sup>\*a</sup>

<sup>a</sup> Department of Chemistry, Shanghai Key Laboratory of Molecular Catalysis and Innovative Materials, Laboratory of Advanced Materials and Collaborative Innovation Center of Chemistry for Energy Materials, Fudan University, No. 220 Handan Road, 200433 Shanghai, P. R. China. E-mail: yitang@fudan.edu.cn

<sup>b</sup> Department of Chemistry, Jinan University, No. 601 Huangpu Avenue West, 510632 Guangzhou, P. R. China. E-mail: tqsgao@jnu.edu.cn

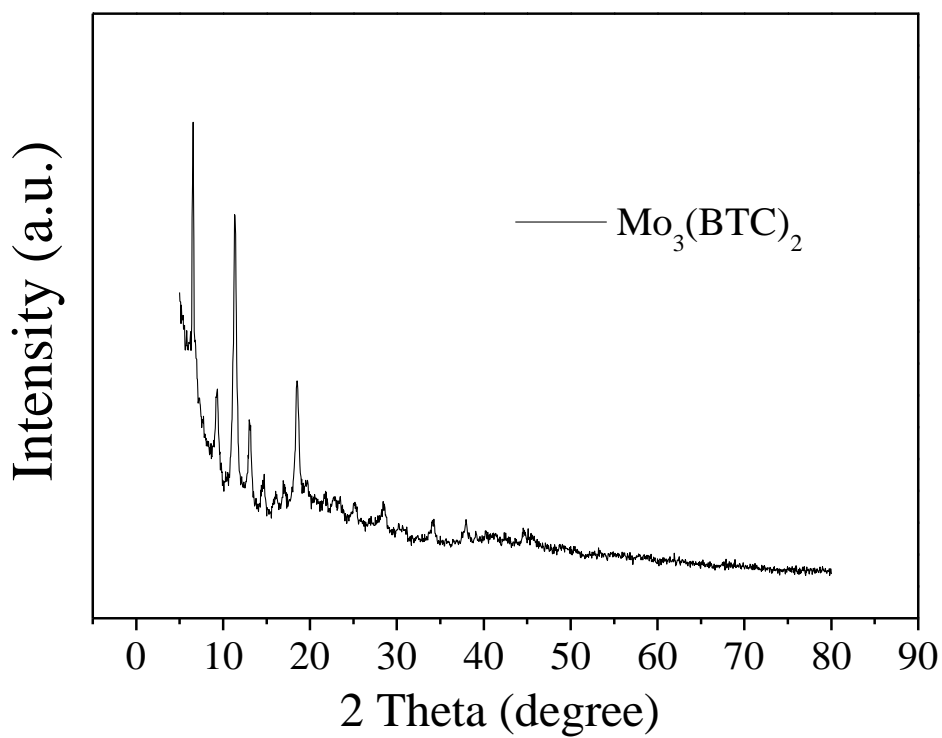

**Fig. S1.** XRD pattern of  $\text{Mo}_3(\text{BTC})_2$  precursor

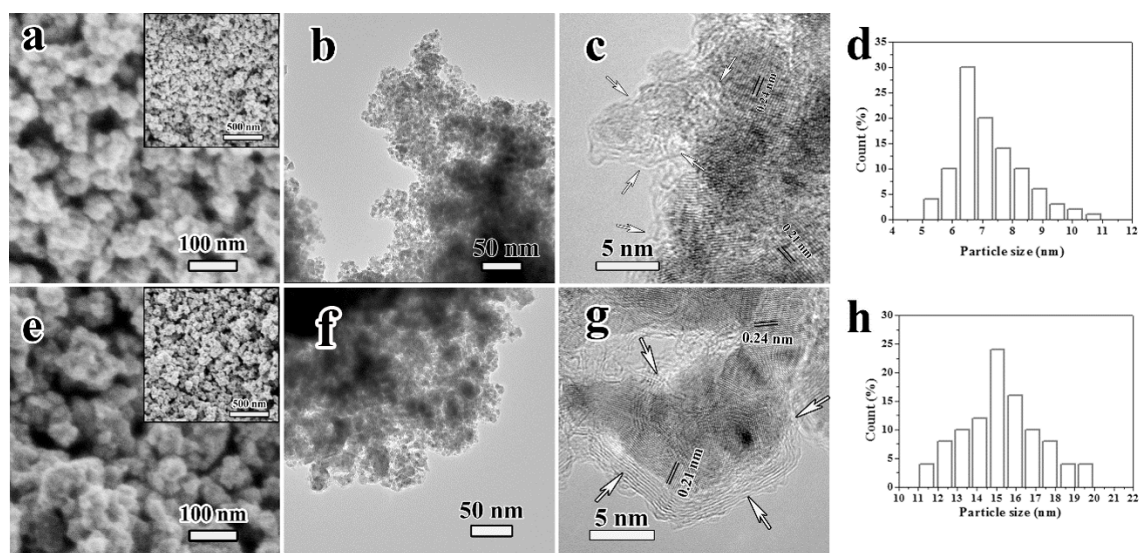

**Fig. S2.** SEM (a) and TEM images (b, c) of nanoMoC@GS(800); SEM (e) and TEM images (f, g) of nanoMoC@GS(900); (d, h) Particle size distribution of the MoC nanoparticles of nanoMoC@GS(800) and nanoMoC@GS(900), respectively.

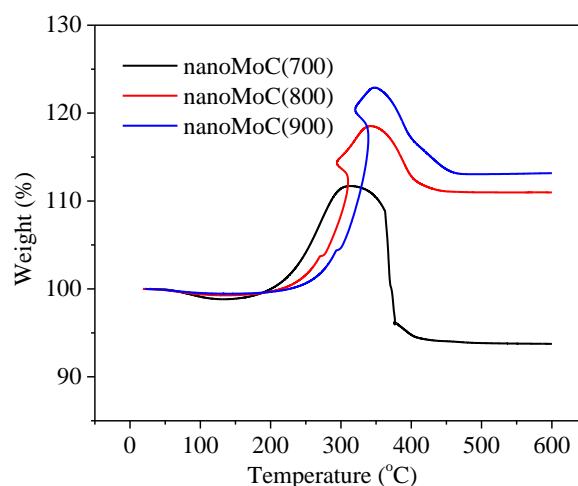

**Fig. S3.** TGA curve of nanoMoC@GS samples for measurement of the carbon content. The initial weight gained below 350 °C was due to the gradual oxidation of MoC<sub>x</sub> to MoO<sub>3</sub>, followed by a significant weight loss caused by the combustion of carbon. Assuming that the sample was composed of stoichiometric MoC and carbon, and converted to only MoO<sub>3</sub> after heating to 600 °C with remaining weight of *c* wt.%, the carbon content in the shell (free carbon not including the carbon in MoC species) is estimated according to the following the equation of  $m(\text{carbon}) = 1 - c \text{ wt.}\% \cdot M(\text{MoC})/M(\text{MoO}_3) = y \text{ wt.}\%$ . Additionally, the Mo content of those catalysts are also quantified by ICP-AES to confirm the TGA results.<sup>S1</sup>

**Table S1.** The contents of each component in nanoMoC@GS samples.

| Sample          | Carbon in shell<br>(wt.%) <sup>a</sup> | MoC<br>(wt.%) <sup>a</sup> | MoC<br>(wt.%) <sup>b</sup> |
|-----------------|----------------------------------------|----------------------------|----------------------------|
| nanoMoC@GS(700) | 30                                     | 70                         | 68                         |
| nanoMoC@GS(800) | 19                                     | 81                         | 78                         |
| nanoMoC@GS(900) | 15                                     | 85                         | 86                         |

<sup>a</sup> calculated according to the TGA curves.

<sup>b</sup> quantified by ICP-AES. 5 mg nanoMoC@GS was dispersed in hydrogen peroxide solution (30 %), and decomposed by stirring. After filtration, the solution was diluted to 50 ml in a volumetric flask for the ICP-AES test. It was found that the contents of MoC determined by TGA and ICP-AES almost gave the same results, confirming the feasibility of the two methods for the detailed element analysis.

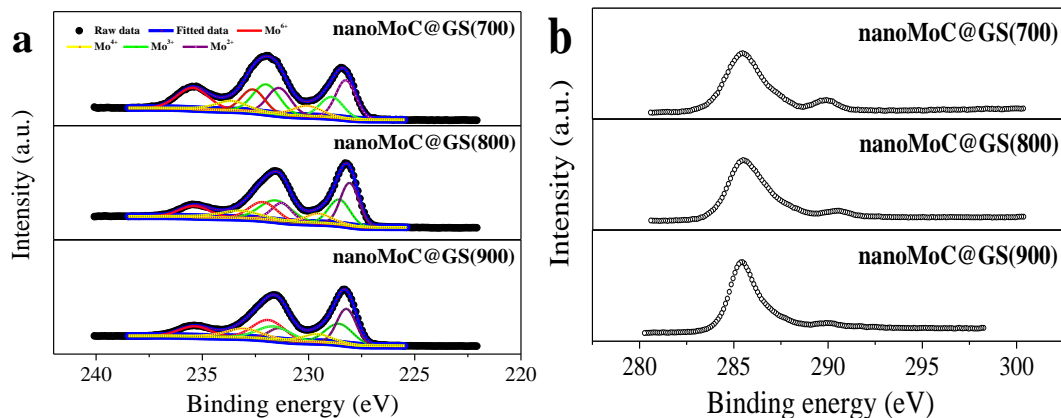

**Fig. S4.** (a) Mo 3d XPS profiles of the as-obtained nanoMoC@GS materials; (b) C 1s XPS profiles of the as-obtained nanoMoC@GS materials.

**Table S2.** Fitting parameters (peak position, peak area and species percentage) for both Mo 3d<sub>5/2</sub> and Mo 3d<sub>3/2</sub> spectra taken on nanoMoC@GS.

| Sample          | species          | B. E. (eV)        |                   | Area              |                   | Mo <sup>3+</sup> /Mo <sup>2+</sup> | Mo <sup>3+</sup> and Mo <sup>2+</sup> (%) |
|-----------------|------------------|-------------------|-------------------|-------------------|-------------------|------------------------------------|-------------------------------------------|
|                 |                  | 3d <sub>5/2</sub> | 3d <sub>3/2</sub> | 3d <sub>5/2</sub> | 3d <sub>3/2</sub> |                                    |                                           |
| nanoMoC@GS(700) | Mo <sup>2+</sup> | 228.3             | 231.4             | 25194             | 19430             | 0.9                                | 61.3                                      |
|                 | Mo <sup>3+</sup> | 228.9             | 232.0             | 15841             | 24465             |                                    |                                           |
|                 | Mo <sup>4+</sup> | 230.0             | 233.4             | 8911              | 5876              |                                    |                                           |
|                 | Mo <sup>6+</sup> | 232.4             | 235.5             | 18307             | 20603             |                                    |                                           |
| nanoMoC@GS(800) | Mo <sup>2+</sup> | 228.2             | 231.3             | 65227             | 27266             | 1.1                                | 62.7                                      |
|                 | Mo <sup>3+</sup> | 228.8             | 231.8             | 52734             | 44856             |                                    |                                           |
|                 | Mo <sup>4+</sup> | 229.8             | 233.3             | 19831             | 24039             |                                    |                                           |
|                 | Mo <sup>6+</sup> | 232.3             | 235.4             | 41649             | 27384             |                                    |                                           |
| nanoMoC@GS(900) | Mo <sup>2+</sup> | 228.3             | 231.4             | 93440             | 33283             | 1.3                                | 56.0                                      |
|                 | Mo <sup>3+</sup> | 228.7             | 231.7             | 73581             | 53833             |                                    |                                           |
|                 | Mo <sup>4+</sup> | 229.8             | 233.3             | 30876             | 40858             |                                    |                                           |
|                 | Mo <sup>6+</sup> | 232.5             | 235.4             | 85807             | 42493             |                                    |                                           |

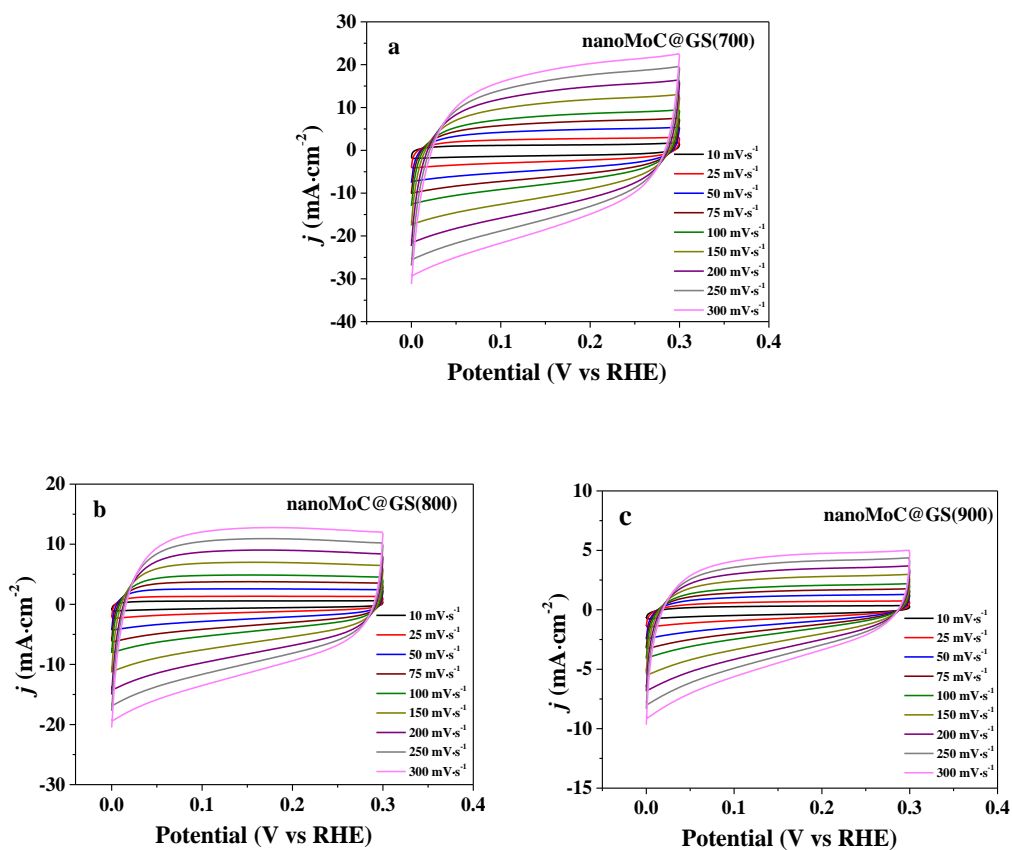

**Fig. S5.** Cyclic voltammograms (CVs) for nanoMoC@GS(700) (a), nanoMoC@GS(800) (b) and nanoMoC@GS(900) (c) with different rates from 10 to 300 mV·s<sup>-1</sup> in the potential range of 0-0.3 V in 0.5 M H<sub>2</sub>SO<sub>4</sub>.  $C_{dl}$  can be used to represent the electrochemical surface area (ESCA) of nanoMoC@GS. NanoMoC@GS(700) has the largest active surface area and thus possesses the most amount of active sites and exposed edges for HER.

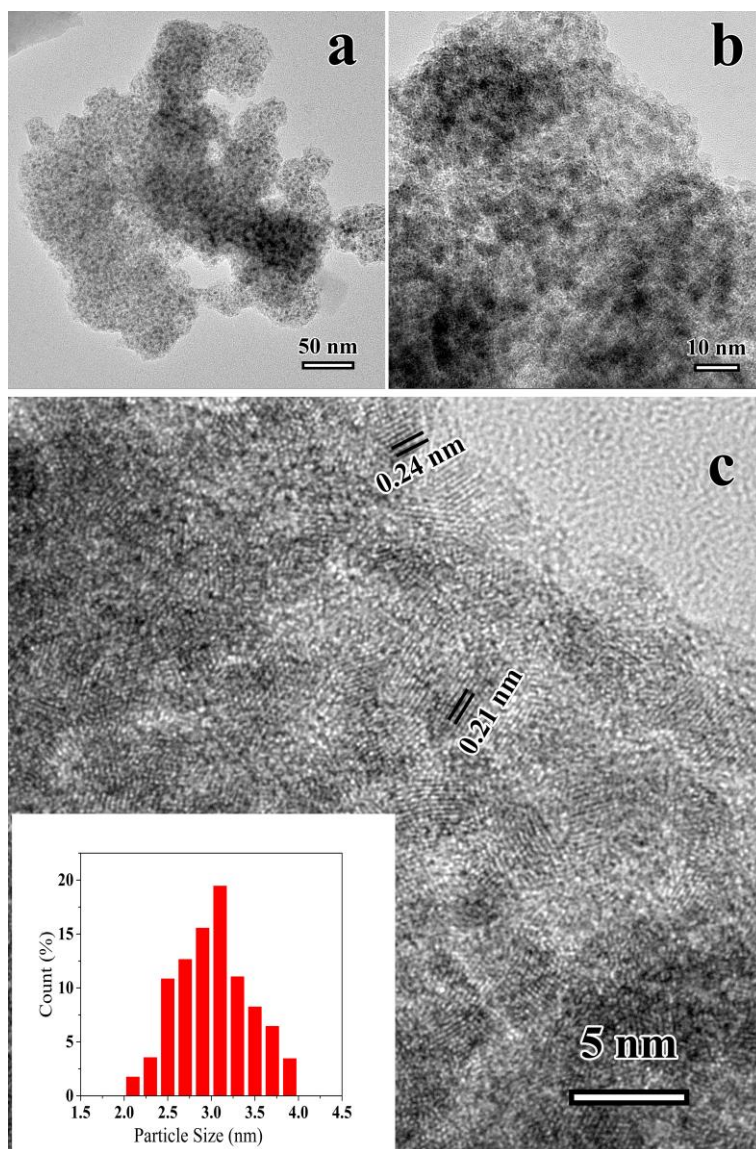

**Fig. S6.** TEM images (a, b and c) of nanoMoC@GS(700) after electrochemical stability test. Inset of c is the particle size distribution of the MoC nanoparticles of nanoMoC@GS(700) after electrochemical stability test.

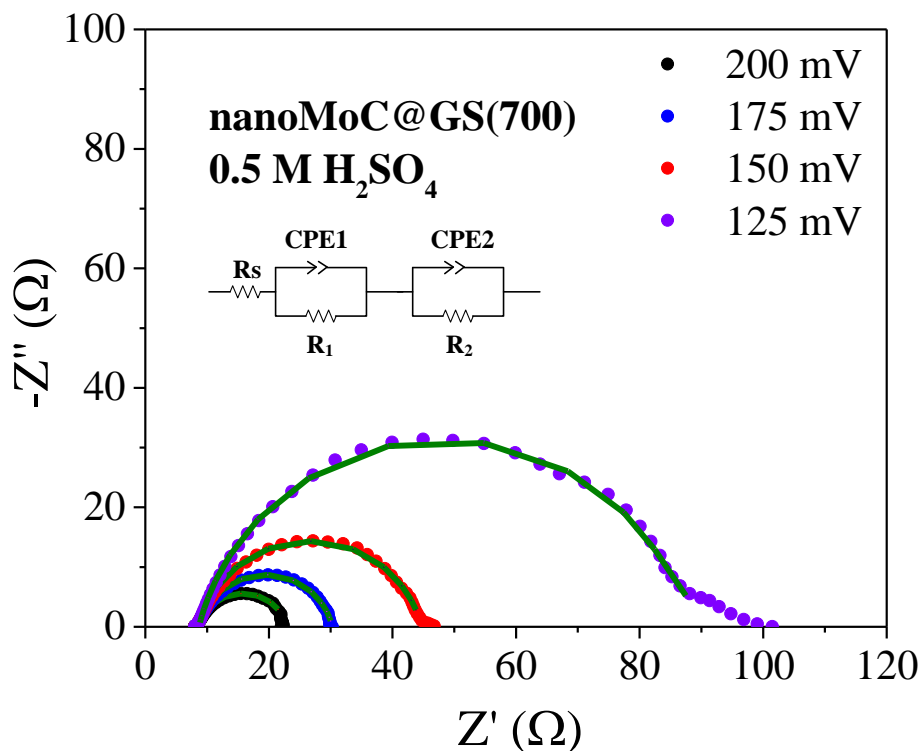

**Fig. S7.** Electrochemical impedance spectroscopy (EIS) for nanoMoC@GS(700) under different overpotential in 0.5 M  $H_2SO_4$ , the data are fitted to the simplified equivalent circuit shown in the inset, and the fitting results are plotted as solid traces. Inset is the Equivalent circuit model for electrochemical impedance tests.  $R_s$ ,  $R_1$  and  $R_2$  represent the electrolyte, electrode porosity and charge transfer resistance, respectively. CPE is the constant phase angle element, which represents the double layer capacitance of solid electrode in the real-world situation. So,  $R_1$  suggested that this electrocatalyst processed an abundant porosity of the obtained nanoMoC@GS catalysts.  $R_2$  was related to electrode kinetics of the obtained materials, and nanoMoC@GS(700) with the small value at the same overpotentials suggested a rapid charge transfer kinetics during the electrochemical process.

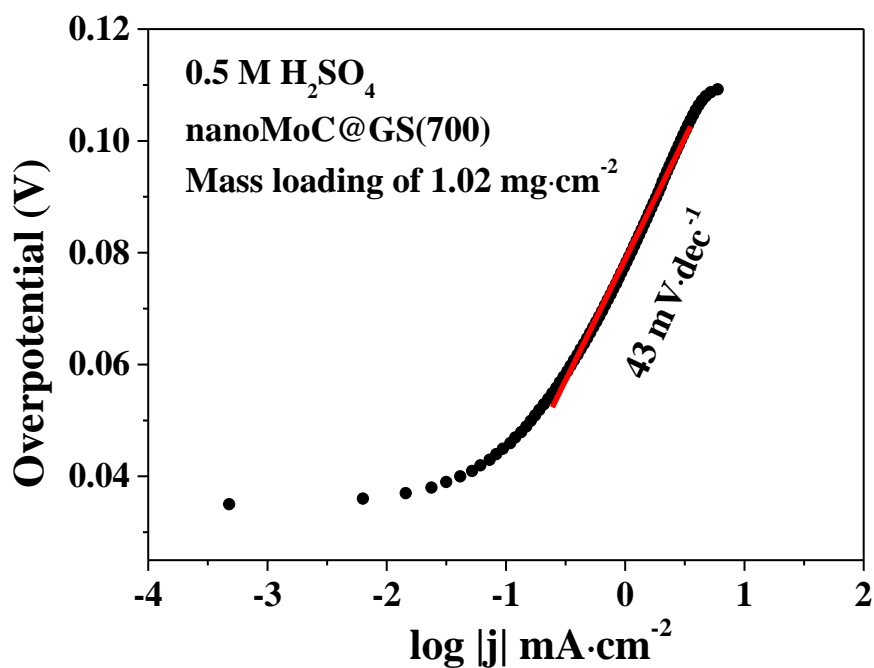

**Fig. S8.** The Tafel plots of nanoMoC@GS(700) with a mass loading of  $1.02 \text{ mg}\cdot\text{cm}^{-2}$  in  $0.5 \text{ M H}_2\text{SO}_4$ .

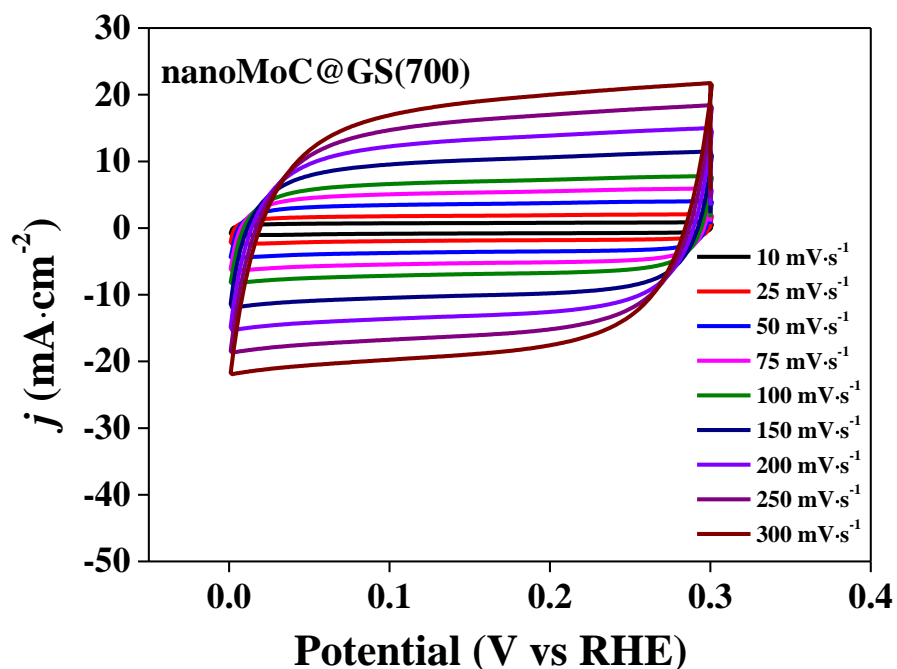

**Fig. S9.** Cyclic voltammograms (CVs) for nanoMoC@GS(700) with different rates from 10 to 300  $\text{mV}\cdot\text{s}^{-1}$  in the potential range of 0-0.3 V in  $1.0 \text{ M KOH}$ .



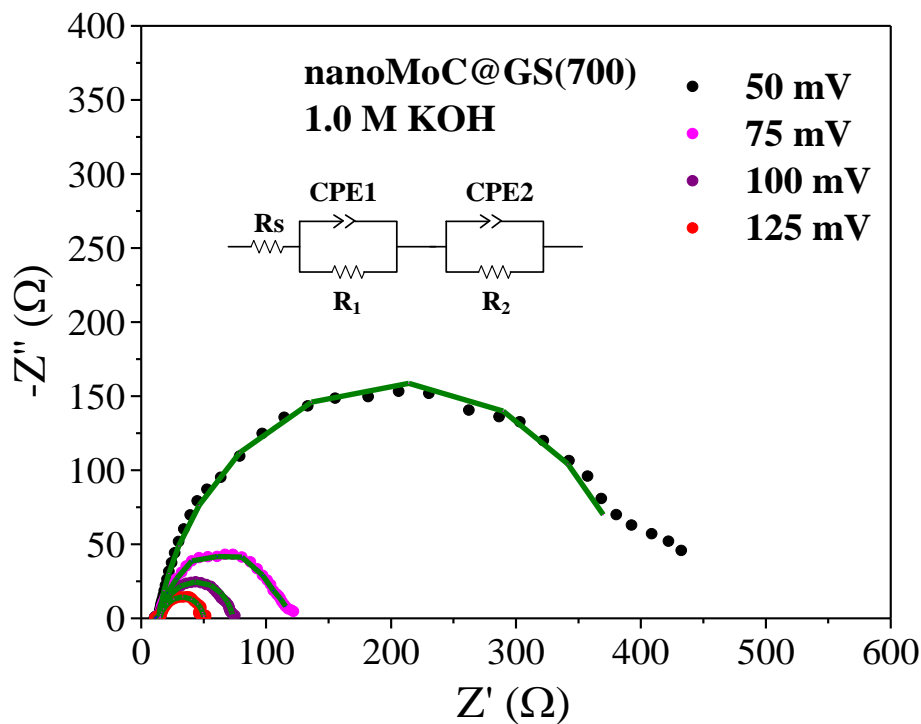

**Fig. S10.** Electrochemical impedance spectroscopy (EIS) for nanoMoC@GS(700) under different overpotential in 1.0 M KOH, the data are fitted to the simplified equivalent circuit shown in the inset, and the fitting results are plotted as solid traces.

**Table S3.** Summary of HER activities of nanoMoC@GS materials.

| Electrolyte   | Sample                       | $\eta_1$ (mV) | $\eta_{10}$ (mV) | $j$ ( $\eta=200$ ) (mA·cm <sup>-2</sup> ) | Tafei slope (mV·dec <sup>-1</sup> ) | $j_0^c$ (mA·cm <sup>-2</sup> ) |
|---------------|------------------------------|---------------|------------------|-------------------------------------------|-------------------------------------|--------------------------------|
| Acidic media. | nanoMoC@GS(700) <sup>a</sup> | 84            | 132              | 100                                       | 46                                  | $13.5 \times 10^{-3}$          |
|               | nanoMoC@GS(700) <sup>b</sup> | 75            | 124              | 146                                       | 43                                  | $15.1 \times 10^{-3}$          |
|               | nanoMoC@GS(800) <sup>a</sup> | 116           | 159              | 45                                        | 51                                  | $7.0 \times 10^{-3}$           |
|               | nanoMoC@GS(900) <sup>a</sup> | 129           | 185              | 18                                        | 56                                  | $5.5 \times 10^{-3}$           |
| Basic media   | nanoMoC@GS(700) <sup>a</sup> | 43            | 77               | -                                         | 50                                  | 0.212                          |

<sup>a</sup>: HER activity data are collected with the mass loading of 0.76 mg·cm<sup>-2</sup>; <sup>b</sup>: HER activity data are collected with the optimal mass loading of 1.02 mg·cm<sup>-2</sup>; <sup>c</sup>:  $j_0$  is related to the exchange current density;

**Table S4.** Comparison of HER performance in acid media for nanoMoC@GS with other electrocatalysts.

| Catalyst                                | Loading (mg·cm <sup>-2</sup> ) | <i>j</i> (mA·cm <sup>-2</sup> ) | <i>η</i> (mV) | Tafel slope (mV·dec <sup>-1</sup> ) | Ref.                                                         |
|-----------------------------------------|--------------------------------|---------------------------------|---------------|-------------------------------------|--------------------------------------------------------------|
| nanoMoC@GS                              | 0.76                           | 1                               | 83            | 46                                  | This work                                                    |
|                                         |                                | 10                              | 132           |                                     |                                                              |
|                                         | 1.02 (optimal)                 | 1                               | 75            | 43                                  |                                                              |
| MoC <sub>x</sub> octahedrons            | 0.8 (optimal)                  | 1                               | 87            | 53                                  | <i>Nat. Commun.</i> <b>2015</b> , 6, 6512.                   |
|                                         |                                | 10                              | 142           |                                     |                                                              |
| MoC-RGO                                 | 0.8                            | 10                              | 150           | 57                                  | <i>Chem. Commun.</i> , <b>2015</b> , 51, 8323.               |
| Mo <sub>2</sub> C-RGO                   | (optimal)                      | 10                              | 221           | 88                                  |                                                              |
| Mo <sub>2</sub> C NTs                   | 0.75 (optimal)                 | 10                              | 172           | 62                                  | <i>Angew. Chem. Int. Ed.</i> <b>2015</b> , 54, 15395.        |
| MoC-Mo <sub>2</sub> C HNWs              | 0.14 (optimal)                 | 10                              | 126           | 43                                  | <i>Chem. Sci.</i> , <b>2016</b> , DOI: 10.1039/c6sc00077k.   |
| Mo <sub>2</sub> C@NC                    | ~0.28                          | 10                              | 124           | 60                                  | <i>Angew. Chem. Int. Ed.</i> <b>2015</b> , 54, 10752.        |
| Mo <sub>2</sub> C/CNT                   | 2.0                            | 10                              | 152           | 65                                  | <i>Energy Environ. Sci.</i> <b>2013</b> , 6, 943.            |
| np-Mo <sub>2</sub> C NWs                | 0.21                           | 10                              | 130           | 53                                  | <i>Energy Environ. Sci.</i> <b>2014</b> , 7, 387.            |
| MoCN                                    | 0.4                            | 10                              | 140           | 46                                  | <i>J. Am. Chem. Soc.</i> <b>2015</b> , 137, 110.             |
| Mo <sub>2</sub> C/CNT-GR                | 0.65-0.67                      | 10                              | 130           | 58                                  | <i>ACS Nano</i> <b>2014</b> , 8, 5164.                       |
| Mo <sub>2</sub> C/RGO                   | 0.285                          | 10                              | 130           | 57.3                                | <i>Chem. Commun.</i> <b>2014</b> , 50, 13135.                |
| MCNs@carbon                             | 0.25                           | 10                              | 78            | 41                                  | <i>Angew. Chem. Int. Ed.</i> <b>2015</b> , 54, 14723.        |
| W-Mo <sub>2</sub> C NWs                 | 1.28                           | 10                              | ~135          | 52                                  | <i>Adv. Funct. Mater.</i> <b>2015</b> , 25, 1520.            |
| Mo <sub>2</sub> C/GCSs                  | 0.36                           | 10                              | 200           | 62.6                                | <i>ACS Catal.</i> <b>2014</b> , 4, 2658.                     |
| Mo <sub>2</sub> C-Mo <sub>2</sub> N     | 1.4                            | 10                              | 177           | -                                   | <i>Energy Environ. Sci.</i> , <b>2013</b> , 6, 1818.         |
| Mo <sub>2</sub> C-Mo <sub>2</sub> N-RGO | 0.47                           | 10                              | 109           |                                     |                                                              |
| MoO <sub>2</sub> @PC-RGO                | 0.14                           | 10                              | 64            | 41                                  | <i>Angew. Chem. Int. Ed.</i> <b>2015</b> , 54, 12928.        |
| WO <sub>2</sub> NWs                     | ~0.35 mg                       | 10                              | 58            | 46                                  | <i>J. Am. Chem. Soc.</i> <b>2015</b> , 137, 6983.            |
| Double-gyroid MoS <sub>2</sub>          | 0.022                          | 6.74                            | 200           | 43-47                               | <i>Nat. Mater.</i> <b>2012</b> , 11, 963.                    |
| Edge-terminated MoS <sub>2</sub>        | 0.28                           | 10                              | 149           | 49                                  | <i>Nat. Commun.</i> <b>2015</b> , 6, 7493.                   |
| MoS <sub>2</sub> @N-doped carbon        | 1.0                            | 10                              | 165           | 55                                  | <i>Angew. Chem. Int. Ed.</i> <b>2015</b> , 54, 7395.         |
| Hierarchical MoS <sub>2</sub>           | 1.0                            | 10                              | 167           | 70                                  | <i>Adv. Mater.</i> <b>2015</b> , DOI: 10.1002/adma.201502765 |
| NiMoN <sub>x</sub> /C                   | 0.25                           | 2                               | 170           | 36                                  | <i>Angew. Chem. Int. Ed.</i> <b>2012</b> , 51, 6131.         |
| MoP NPs                                 | 0.36                           | 10                              | 125           | 54                                  | <i>Adv. Mater.</i> <b>2014</b> , 26, 5702.                   |
| WC-CNTs                                 | /                              | 10                              | 145           | 72                                  | <i>ACS Nano</i> <b>2015</b> , 9, 5125.                       |
| P-WN/rGO                                | 0.337                          | 10                              | 85            | 54                                  | <i>Angew. Chem. Int. Ed.</i>                                 |

|                                    |       |    |     |    |                                                       |
|------------------------------------|-------|----|-----|----|-------------------------------------------------------|
|                                    |       |    |     |    | <b>2015, 54, 6325.</b>                                |
| Ni <sub>2</sub> P hollow particles | 1     | 10 | 116 | 46 | <i>J. Am. Chem. Soc.</i> <b>2013</b> , 135, 9267.     |
| CoP/CNT                            | 0.285 | 10 | 122 | 54 | <i>Angew. Chem. Int. Ed.</i> <b>2014</b> , 126, 6828. |
| Cu <sub>3</sub> P NWs/CF           | 15.2  | 10 | 143 | 67 | <i>J. Am. Chem. Soc.</i> <b>2014</b> , 136, 7587.     |
| Co/N-rich CNTs                     | 0.28  | 10 | 260 | 69 | <i>Angew. Chem. Int. Ed.</i> <b>2014</b> , 53, 4372.  |

**Table S5.** Comparison of HER performance in basic media for nanoMoC@GS with other electrocatalysts.

| Catalyst                                       | Loading<br>(mg·cm <sup>-2</sup> ) | <i>j</i><br>(mA·cm <sup>-2</sup> ) | <i>η</i><br>(mV)  | Tafel slope<br>(m·dec <sup>-1</sup> ) | Ref.                                                             |
|------------------------------------------------|-----------------------------------|------------------------------------|-------------------|---------------------------------------|------------------------------------------------------------------|
| nanoMoC@GS                                     | 0.76                              | $\frac{1}{10}$                     | $\frac{43}{77}$   | 50                                    | This work                                                        |
| MoC <sub>x</sub><br>octahedrons                | 0.8                               | $\frac{1}{10}$                     | $\frac{92}{151}$  | 59                                    | <i>Nat. Commun.</i> 2015,<br>6, 6512.                            |
| Mo <sub>2</sub> C<br>microparticles            | 0.8-2.3                           | 20                                 | 210-240           | 54-59                                 | <i>Angew. Chem. Int.<br/>Ed.</i> <b>2012</b> , 51, 12703.        |
| MoC-Mo <sub>2</sub> C<br>HNWs                  | 0.14<br>(optimal)                 | 10                                 | 120               | 42                                    | <i>Chem. Sci.</i> , <b>2016</b> ,<br>DOI:<br>10.1039/c6sc00077k. |
| Ni-Mo <sub>2</sub> C<br>nanorods               | 0.43                              | 10                                 | ca. 140           | 49                                    | <i>Appl. Catal., B</i> , <b>2014</b> ,<br>154, 232.              |
| Mo <sub>2</sub> C NTs                          | 0.75                              | 10                                 | 112               | 55                                    | <i>Angew. Chem. Int.<br/>Ed.</i> <b>2015</b> , 54, 15395.        |
| Mo <sub>2</sub> C@NC                           | 0.28                              | 10                                 | 60                | /                                     | <i>Angew. Chem. Int.<br/>Ed.</i> <b>2015</b> , 54, 10752.        |
| MCNs@carbon                                    | 0.25                              | 10                                 | 78                | 41                                    | <i>Angew. Chem. Int.<br/>Ed.</i> <b>2015</b> , 54, 14723.        |
| WC-CNTs                                        | /                                 | 10                                 | 165               | 72                                    | <i>ACS Nano</i> <b>2015</b> , 9,<br>5125.                        |
| MoS <sub>2</sub><br>nanosheet<br>arrays        | /                                 | 10                                 | 190               | 100                                   | <i>Electrochim. Acta</i><br><b>2015</b> , 168, 256.              |
| MoP                                            | 0.86                              | 10                                 | 130               | 48                                    | <i>Energy Environ. Sci.</i><br><b>2014</b> , 7, 2624.            |
| Ni-Mo<br>nanopowder                            | 1                                 | 10                                 | ~80               | /                                     | <i>ACS Catal.</i> <b>2013</b> , 3,<br>166.                       |
| Co@Co-<br>oxo/hydroxo<br>phosphate             | /                                 | 2                                  | 385               | 140                                   | <i>Nat. Mater.</i> <b>2012</b> , 11,<br>802.                     |
| CoP NW arrays                                  | 0.92                              | $\frac{1}{10}$                     | $\frac{115}{209}$ | 129                                   | <i>J. Am. Chem. Soc.</i><br><b>2014</b> , 136, 7587.             |
| NiS <sub>2</sub><br>nanosheets                 | 4.1                               | 10                                 | 150               | 69                                    | <i>Electrochimica Acta</i><br><b>2015</b> , 153, 508.            |
| Ni <sub>3</sub> S <sub>2</sub> /nickel<br>foam | 1.6                               | 10                                 | 223               | /                                     | <i>J. Am. Chem. Soc.</i><br><b>2015</b> , 137, 14023.            |
| NiP <sub>2</sub> nanosheet                     | 4.3                               | 10                                 | 102               | 64                                    | <i>Nanoscale.</i> <b>2014</b> , 6,<br>13440.                     |
| WP NW<br>arrays                                | 2.0                               | 10                                 | 150               | 102                                   | <i>ACS Appl. Mater.<br/>Inter.</i> <b>2014</b> , 6, 21874.       |

## Reference

- [S1] H. B. Wu, B. Y. Xia, L. Yu, X. Y. Yu and X. W. D. Lou, *Nat. commun.*, 2015, **6**, 6512.
